**Legend:**

- Module **M1** (cellulose / xylan degradation)
- Module **M2** (xylan / xyloglucan degradation)
- Module **M3** (pectin degradation)
- Module **M4** (oligosaccharide degradation)

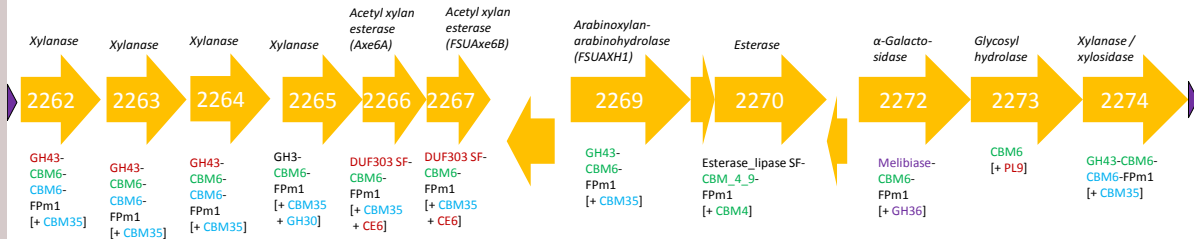

Source: https://www.biorxiv.org/content/biorxiv/suppl/2014/05/21/005355.DC1/005355-5.pdf
